# Supplementary material
Source: HighWire-hosted journal article supplement (https://bmjopenquality.bmj.com/highwire/filestream/147515/field_highwire_adjunct_files/0/bmjqs-2015-004567supp.pdf)
Supplement: bmjqs-2015-004567supp.pdf [file bmjqs-2015-004567supp.pdf]

Recommendations for Bed Band set up instructions

| Step | Text                                                                                                                                                                                                                                                                                                                                                                              | Images                                                                                                                                                                                                           |
|------|-----------------------------------------------------------------------------------------------------------------------------------------------------------------------------------------------------------------------------------------------------------------------------------------------------------------------------------------------------------------------------------|------------------------------------------------------------------------------------------------------------------------------------------------------------------------------------------------------------------|
| 1    | Adjust bed height as required                                                                                                                                                                                                                                                                                                                                                     | -                                                                                                                                                                                                                |
| 2    | Ensure bed is in a flat position                                                                                                                                                                                                                                                                                                                                                  | -                                                                                                                                                                                                                |
| 3    | Ensure correct positioning of base unit: <ul style="list-style-type: none"><li>· align the bottom of the base unit with the bed crease</li><li>· ensure that the base unit is aligned centrally</li><li>· ensure that the base unit is sufficiently secure with no creasing</li></ul>                                                                                             | Provide a front-on image depicting the correct placement of the Bed Band in situ                                                                                                                                 |
| 4    | Secure all (eight) side straps to the bedframe: <ul style="list-style-type: none"><li>· lift mattress to reveal the side bars on bedframe</li><li>· loop side straps around the side bars on bedframe</li><li>· advise that it is not necessary to secure the side straps in any particular order</li><li>· secure side straps to the base unit using Velcro components</li></ul> | Provide an image that depicts straps being attached around the appropriate side bars on the bed frame (underneath the mattress). Consider alternative image showing incorrect placement (e.g., around cot sides) |
| 5    | Adjust bed height as required for patient placement                                                                                                                                                                                                                                                                                                                               | -                                                                                                                                                                                                                |
| 6    | Advise patient to lie on bed/Bed Band                                                                                                                                                                                                                                                                                                                                             | -                                                                                                                                                                                                                |
| 7    | Elevate the head of the bed: <ul style="list-style-type: none"><li>· ensure a comfortable semi-recumbent position</li><li>· apply strategic positioning support as required (e.g., knee bend)</li></ul>                                                                                                                                                                           | --                                                                                                                                                                                                               |
| 8    | Position support cushions: <ul style="list-style-type: none"><li>· position cushions under patient's axilla</li><li>· ensure cushions are fitted tight to the patient's torso</li><li>· Ensure both cushions are positioned at an equal height</li></ul>                                                                                                                          | -                                                                                                                                                                                                                |
| 9    | Place pillow under patient's head                                                                                                                                                                                                                                                                                                                                                 | -                                                                                                                                                                                                                |

General recommendations

| Text                                                                                                                                                                                                                         | Images                                                                                                                                                                                                                                                     |
|------------------------------------------------------------------------------------------------------------------------------------------------------------------------------------------------------------------------------|------------------------------------------------------------------------------------------------------------------------------------------------------------------------------------------------------------------------------------------------------------|
| <ul style="list-style-type: none"><li>· Ensure that text is legible using a large font</li><li>· Specify number of people required to set up the Bed Band</li><li>· Include instructions for cleaning the Bed Band</li></ul> | <ul style="list-style-type: none"><li>· Ensure images are sufficiently large and in high resolution colour</li><li>· Provide diagrammatic representation of Bed Band with key components (e.g., base unit/side straps/support cushions) labelled</li></ul> |
